# Supplementary material
Source: publisher site journal article supplement (https://www.dovepress.com/article/239479)
Supplement: Supplementary file 1 [file get_supplementary_file.php]

Identification of Apolipoprotein E as a potential biomarker for nasopharyngeal carcinoma

Ying Xue1#, Shuo Hung1, Jing Huang1, Shuang Li1, Cen Zhang1, Xuhong Zhou1*

1The Department of Otorhinolaryngology-Head and Neck Surgery, Zhongnan Hospital, Wuhan University, Wuhan 430071, Hubei, P.R. China

**Address correspondence to**: Dr. Xuhong Zhou. The Department of Otorhinolaryngology-Head and Neck Surgery, Zhongnan Hospital of Wuhan University. NO. 169 Donghu Road, Wuhan 430071, Hubei, China. E-mail: [xuhongzz@sina.com](mailto:xuhongzz@sina.com)

**Raw data of western blot**

**
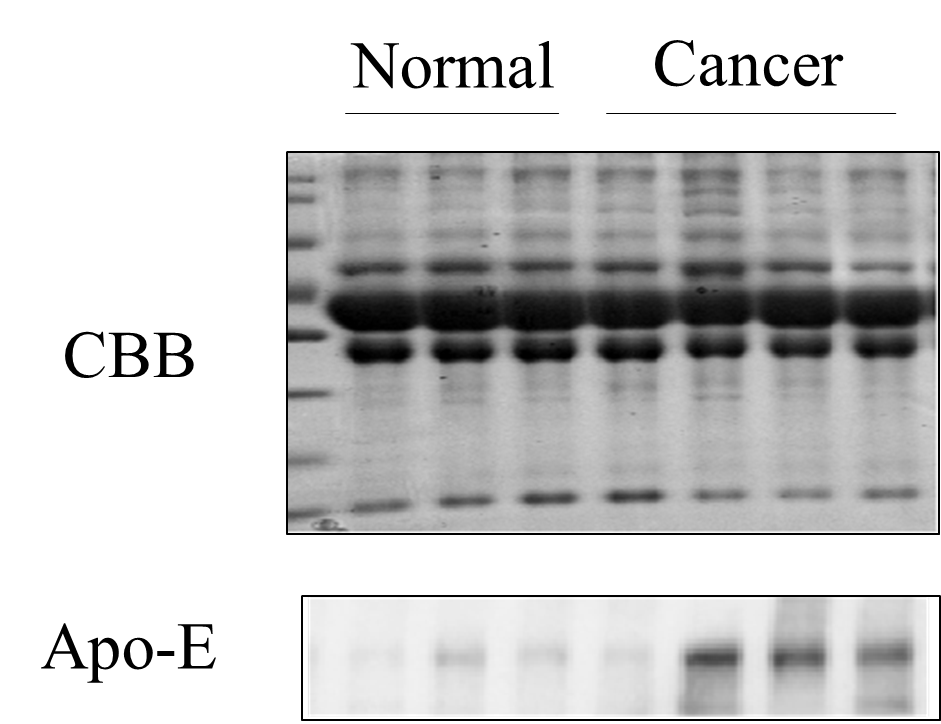
**

Supplementary Figurer 1. Western blot analysis of Apo-E expression in serum of normal healthy and NPC patients.


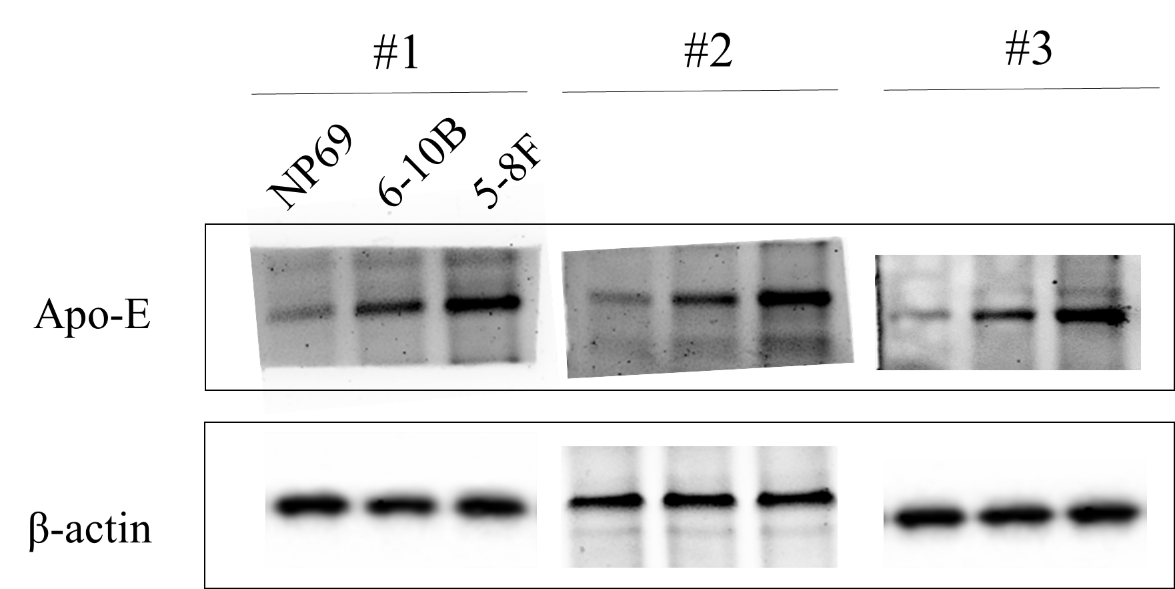


Supplementary Figure 2. Western blot analysis of Apo-E level in NP-69, 6-10B and 5-8F cell lines.


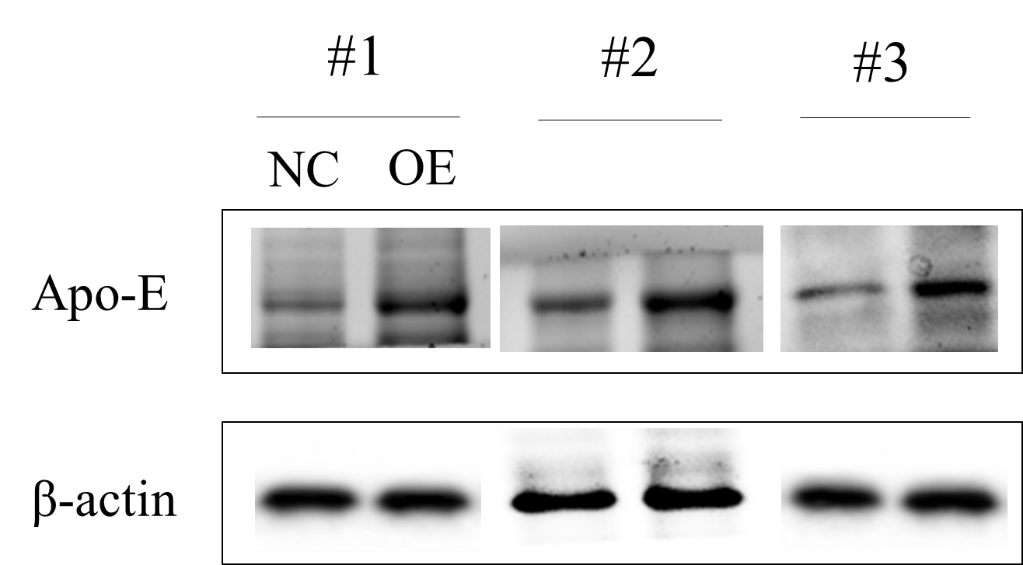


Supplementary Figure 3. Western blot was performed to check the Apo-E knockdown efficiency.
